# Supplementary material for: Climatic Variability Determines the Biological Diversity and Function of a Mixed Forest in Northeastern China at the Local-Scale
Source: MDPI journal article supplement (doi:10.3390/f14010098), 2023-01-04
Supplement: s1 [file s1]

**Figure S1**

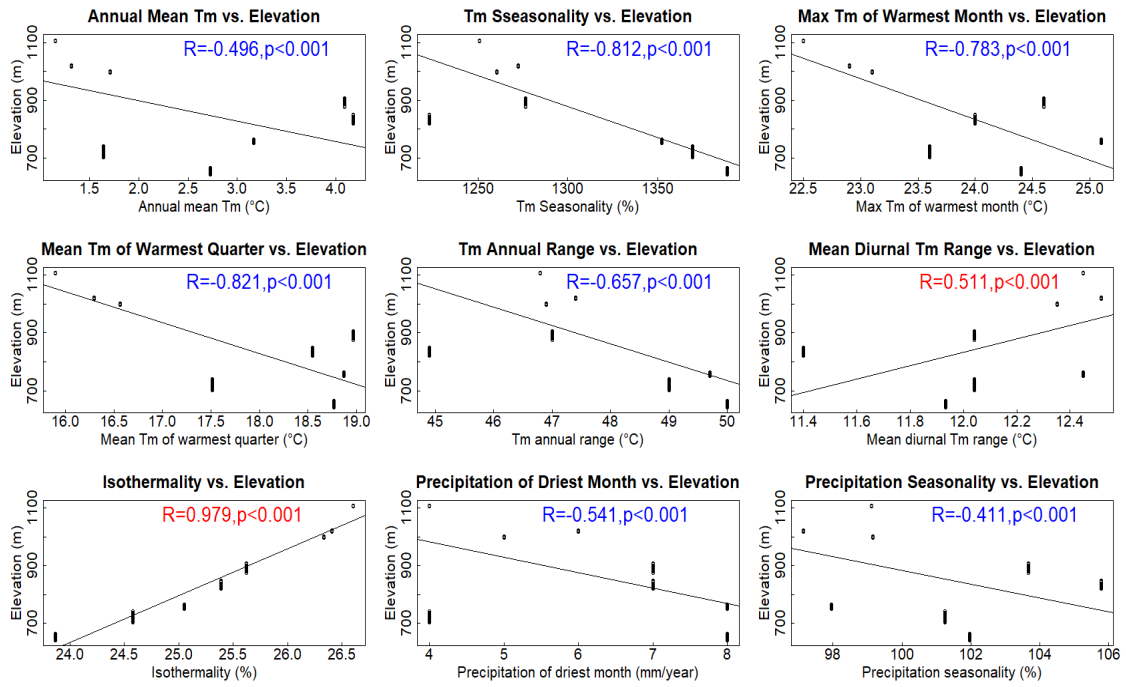

**Figure S1.** Spearman's correlation relationships between elevation and climatic variables. Climatic variables include mean annual temperature (Ann\_Tavr), temperature seasonality (Seasonality\_T), maximum temperature of the warmest month (W\_Mo\_Tmax), mean temperature of the Warmest Quarter (W\_Quart\_Tavr), annual temperature range (Ann\_Rng\_T), mean diurnal temperature range (Diurnal\_Rng\_T), isothermality (isothermality, precipitation of the driest month (D\_Mo\_P) and precipitation seasonality (Seasonality\_P). Tm denotes temperature. Positive and negative correlations are presented in red and blue, respectively.

**Figure S2**

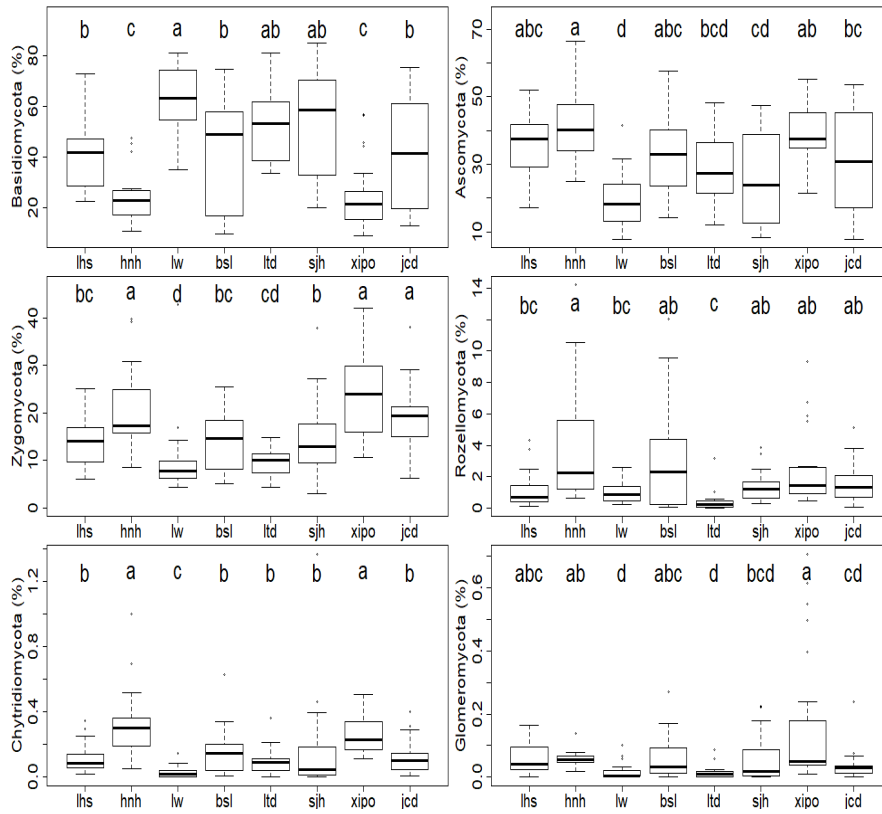

**Figure S2.** Fungal phylum groups along the elevation gradient. Different letters (a–e) indicate significant differences between the three different disturbance levels. \*\*\*,  $p < 0.001$ ; \*\*,  $p < 0.01$ ; \*,  $p < 0.05$ .

**Figure S3**

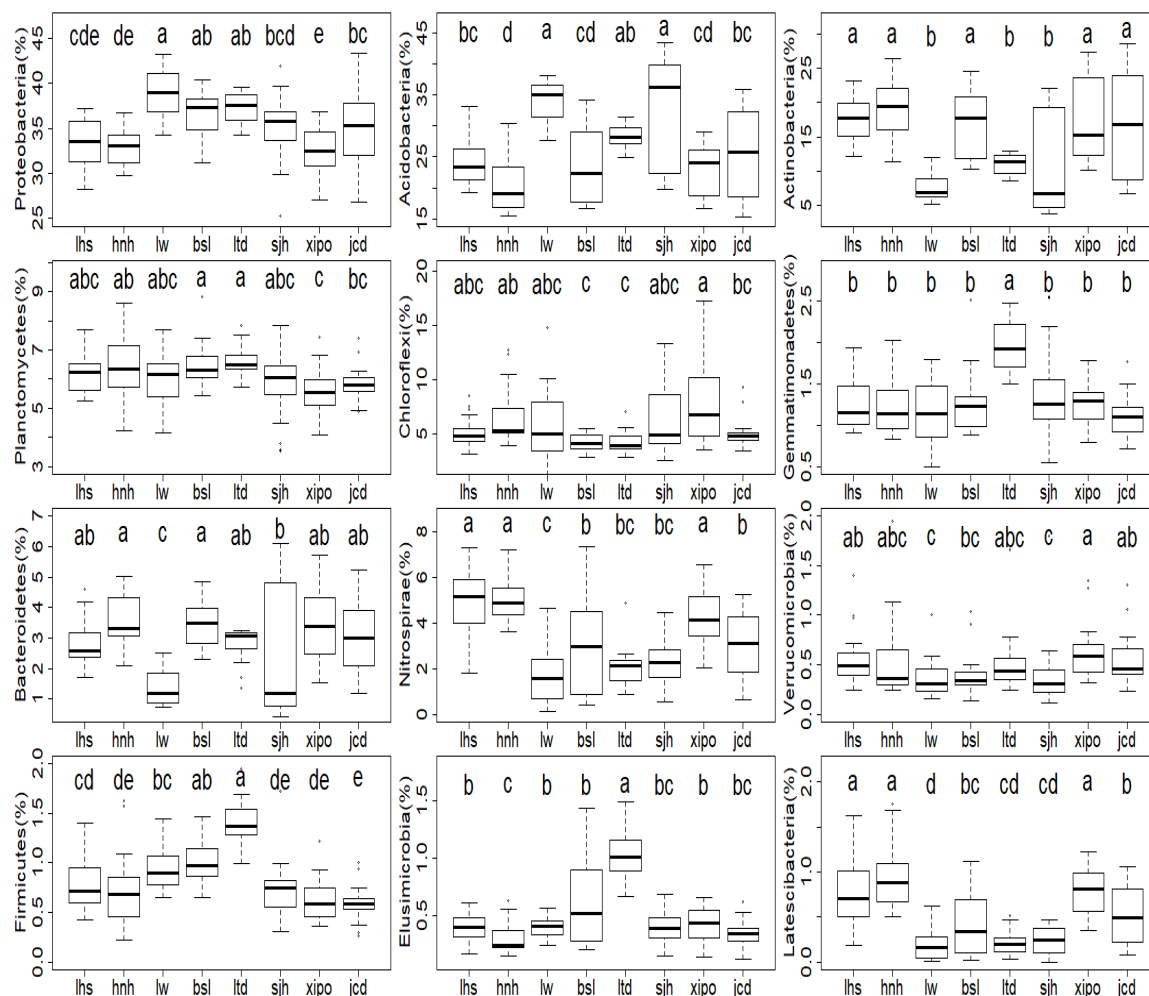

**Figure S3.** Bacterial phylum groups along the elevation gradient. Different letters (a–e) indicate significant differences among different sampling plots. \*\*\*,  $p < 0.001$ ; \*\*,  $p < 0.01$ ; \*,  $p < 0.05$ .
