# Supplementary material for: Climatic Variability Determines the Biological Diversity and Function of a Mixed Forest in Northeastern China at the Local-Scale
Source: MDPI journal article supplement (doi:10.3390/f14010098), 2023-01-04
Supplement: s1 [file s1]

Archive with 1 entries (1 files):
- forests-2100717-supplementary.pdf
